# Supplementary material for: An extraction method for nitrogen isotope measurement of ammonium in low concentrated environment
Source: Copernicus journal article supplement (doi:10.5194/egusphere-2023-481), 2023-05-22

# Supplement of “An extraction method for nitrogen isotope measurement of ammonium in low concentrated environment”

Alexis Lamothe<sup>1</sup>, Joel Savarino<sup>1</sup>, Patrick Ginot<sup>1</sup>, Lison Soussaintjean<sup>2</sup>, Elsa Gautier<sup>1</sup>, Pete Akers<sup>3</sup>, Nicolas Caillon<sup>1</sup>, Joseph Erbland<sup>1</sup>

5 <sup>1</sup>Univ. Grenoble Alpes, CNRS, IRD, INRAE, Grenoble INP\*, IGE, 38000 Grenoble, France

\*Institute of Engineering and Management Univ. Grenoble Alpes

<sup>2</sup>Climate and Environmental Physics, Physics Institute & Oeschger Centre for Climate Change Research, University of Bern, 3012 Bern, Switzerland

<sup>3</sup>Discipline of Geography, School of Natural Sciences, Trinity College Dublin, Dublin, Ireland

10 *Correspondence to:* Alexis Lamothe (alexis.lamothe@univ-grenoble-alpes.fr) or Joel Savarino (joel.savarino@cnrs.fr)

**Figure S1: schematic isotopic mass balance on Nitrogen for  $N_2O_{\text{measured}}$**

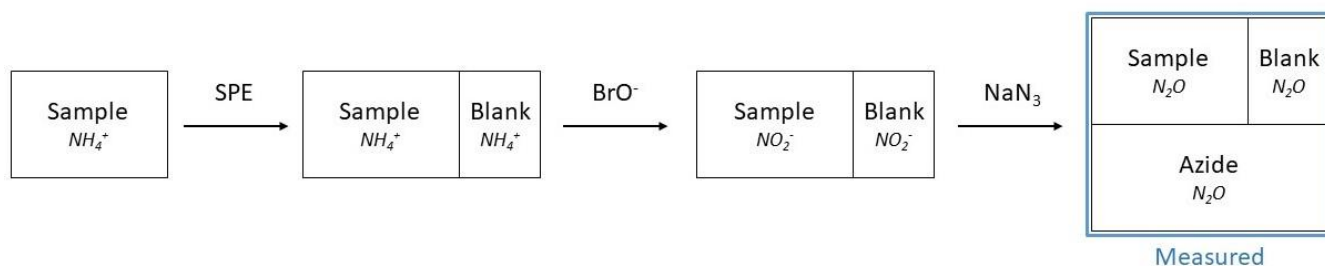

Supplement: Supplementary file 1 [file egusphere-2023-481-supplement.pdf]
